# Supplementary material for: Doped TiO2: the effect of doping elements on photocatalytic activity
Source: Royal Society of Chemistry journal article supplement (doi:10.1039/d0ma00171f), 2020-01-01
Supplement: d0ma00171f1.pdf [file d0ma00171f1.pdf]

Electronic Supplementary Information

Doped TiO<sub>2</sub>: effect of doping element on the photocatalytic activity

Anna Khlyustova, Nikolay Sirotkin, Tatyana Kusova, Anton Kraev, Valery Titov, Alexander Agafonov

G. A. Krestov Institute of Solution Chemistry of Russian Academy of Sciences

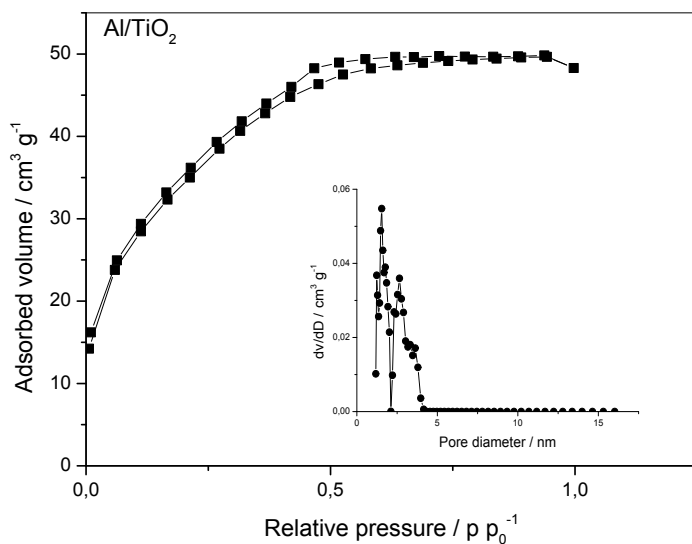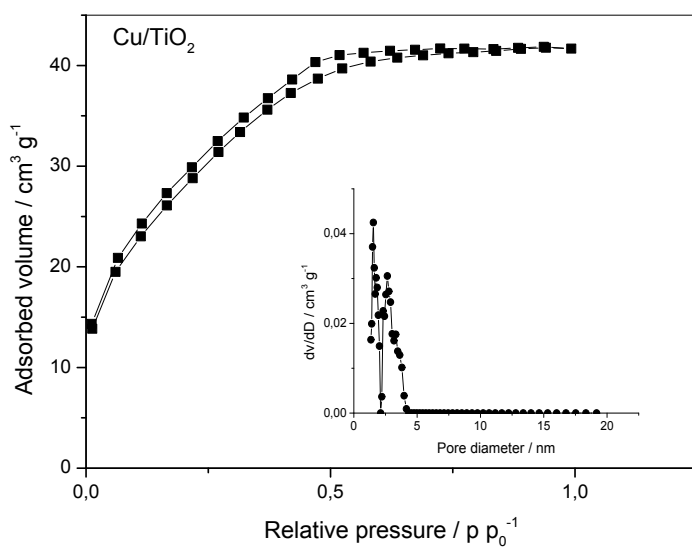

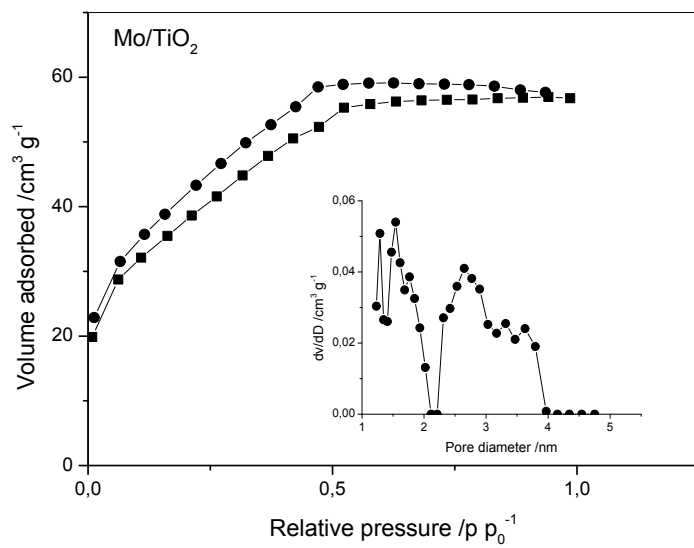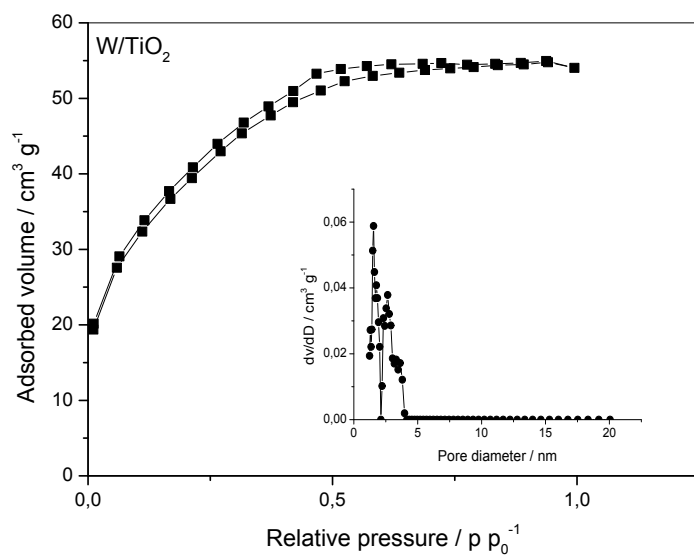

Figure S1 Nitrogen adsorption-desorption isotherms collected at 77 K and pore distribution curves (inside) for Al/TiO<sub>2</sub> (a), Cu/TiO<sub>2</sub> (b), Mo/TiO<sub>2</sub> (c) и W/TiO<sub>2</sub> (d)

## II Surface morphology and distribution particle size in liquid phase

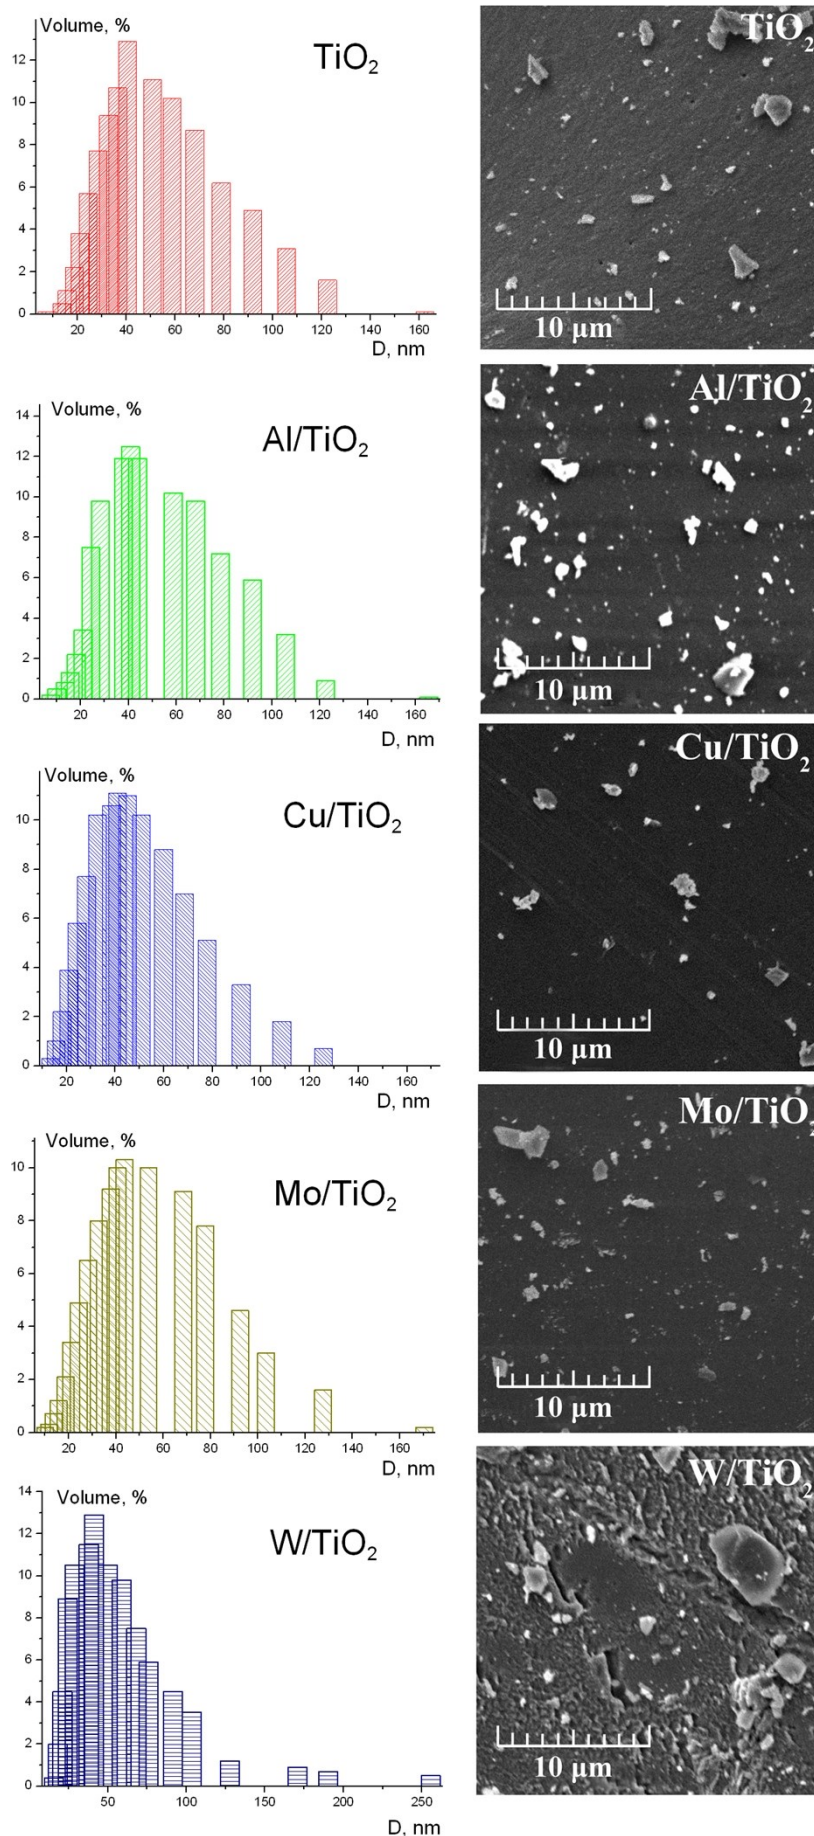

Figure S2 Particle size distribution histograms and SEM images of undoped and doped  $\text{TiO}_2$

### III Kinetics of adsorption models

Three kinetic models were analyzed and proved for undoped and doped  $\text{TiO}_2$  samples. Figures S3-S4 show plots for the pseudo-first, pseudo-second, and intraparticle diffusion models.

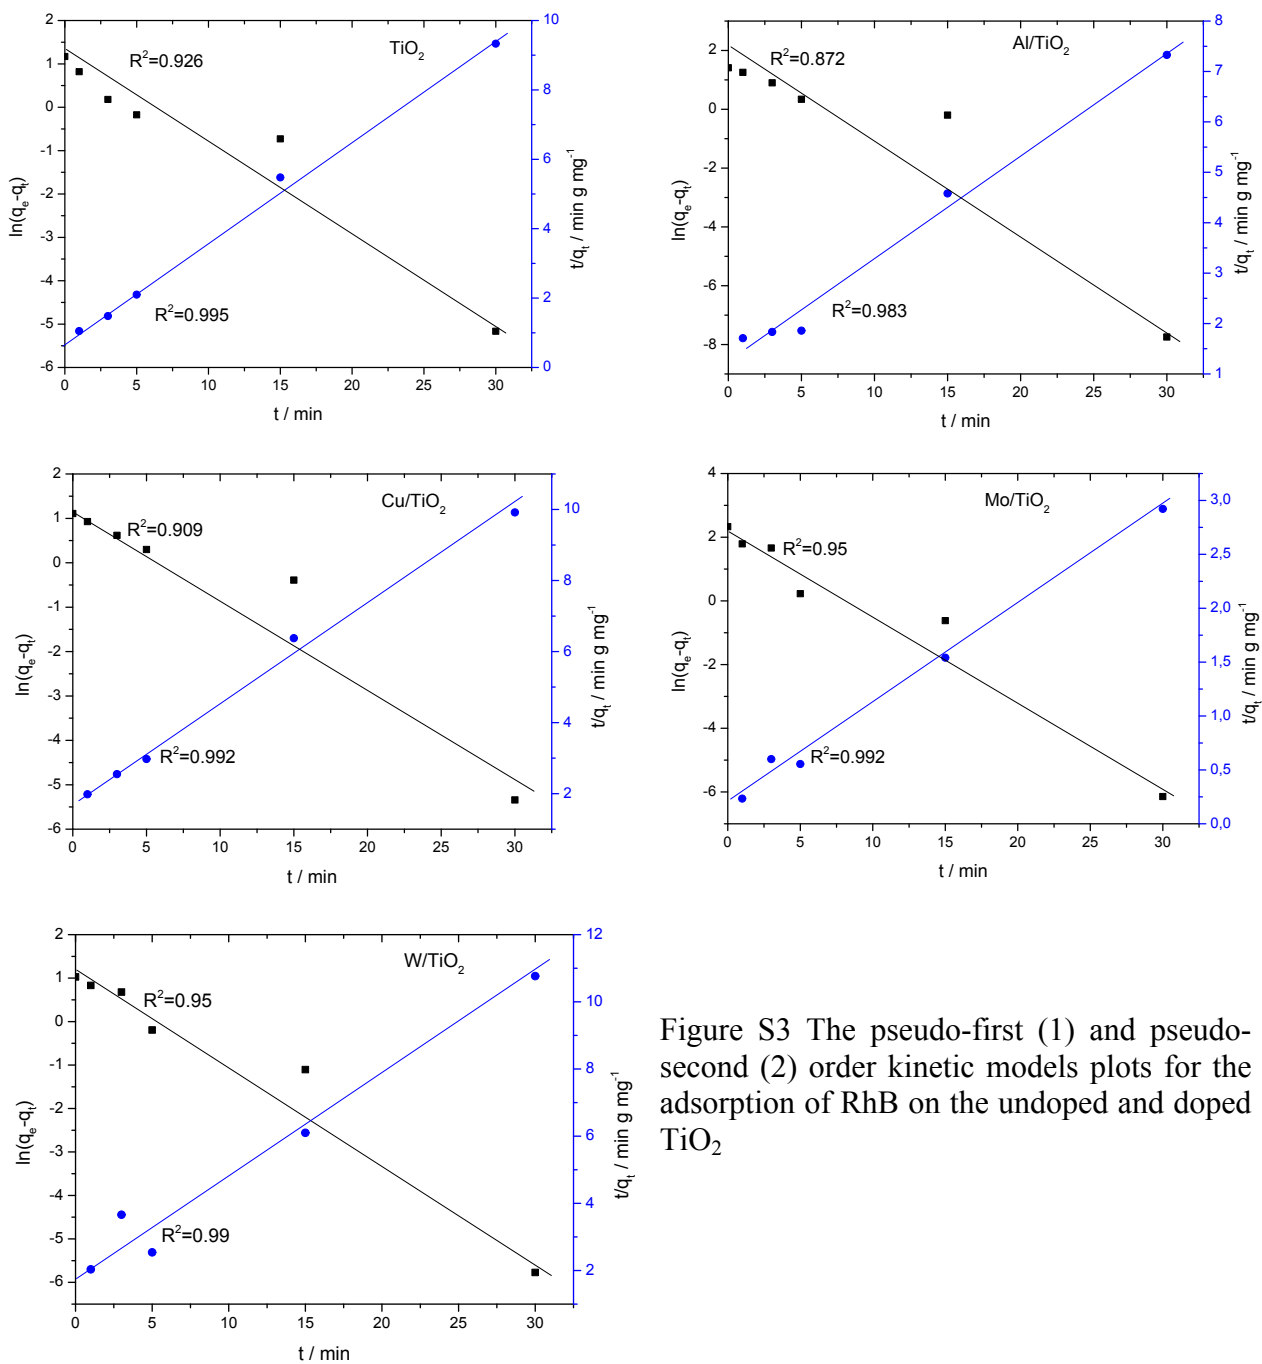

Figure S3 The pseudo-first (1) and pseudo-second (2) order kinetic models plots for the adsorption of RhB on the undoped and doped  $\text{TiO}_2$

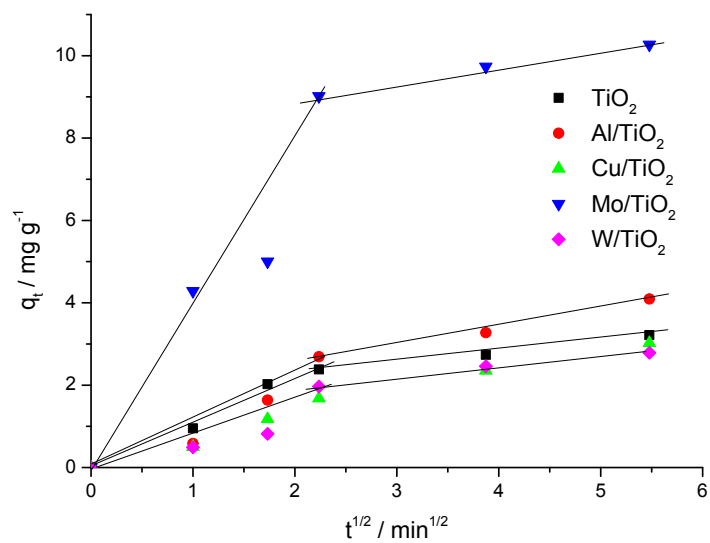

Figure S4 Intraparticle diffusion model for adsorption of Rhodamine B on undoped and doped titanium dioxide

#### IV UV-vis spectra of Rhodamine B during experiments on photocatalysis

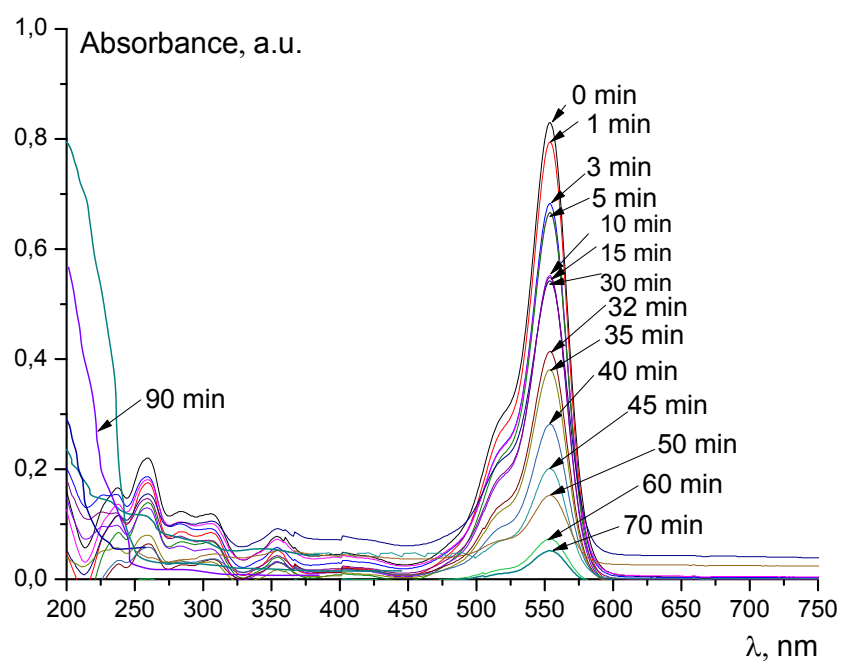

Figure S5 UV-Vis spectra of Rhodamine B dye during sorption (0-30 minutes) and photocatalysis (30-90 minutes) on Mo/TiO<sub>2</sub>
